# Supplementary material for: Activation of Peroxisome Proliferator-Activated Receptorγby Rosiglitazone Inhibits Lipopolysaccharide-Induced Release of High Mobility Group Box 1
Source: Hindawi journal article supplement (doi:10.1155/2012/352807), 2012-01-01

## **Supplementary figure legends**

**Supplementary figure 1:** Effects of PPAR ligands on cell viability. RAW264.7 cells were incubated with various concentrations of WY-14643 (a specific agonist for PPAR $\alpha$ ), GW501516 (a specific agonist for PPAR $\delta$ ), or rosiglitazone (a specific agonist for PPAR $\gamma$ ) for 24 h. Cells were then washed with ice-cold PBS, harvested, and mixed with a 0.4% trypan blue solution. Viable cells in the cell suspension were counted using a hemacytometer. Data are expressed as the means $\pm$ SE (n=6).

**Supplementary figure 2:** Effects of rosiglitazone on the LPS-induced release of MCP-1, MIP-1 $\beta$ , and TNF- $\alpha$ . RAW264.7 cells grown to 60% confluency were incubated with serum-free medium for 24 h and then stimulated with LPS in the presence or absence of rosiglitazone for 24 h. Equal volumes of conditioned media were subjected to Western blot analysis. Ponceau S staining was used as a loading control.

**Supplementary Figure 3:** Effects of rosiglitazone on the expression of iNOS. RAW264.7 cells were grown to 60% confluency incubated with serum-free medium for 24 h and then stimulated with LPS in the presence or absence of rosiglitazone for 24 h. Total protein was extracted, fractionated by electrophoresis, and immunoblotted using an iNOS antibody.

Supplementary Figure 1

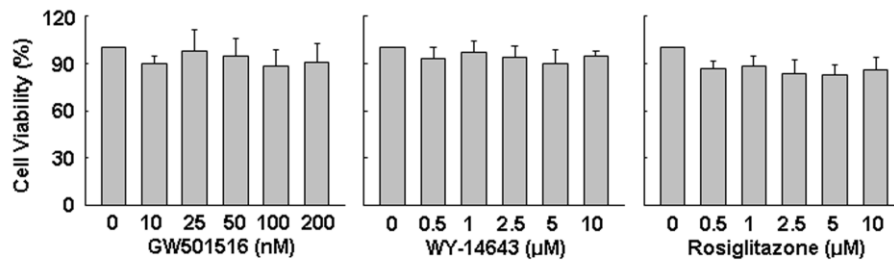

## Supplementary Figure 2

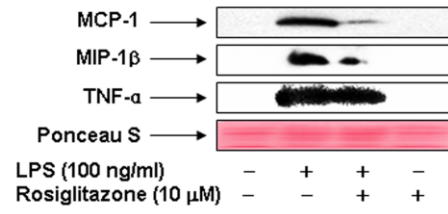

### Supplementary Figure 3

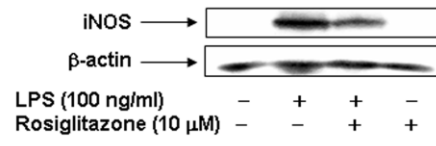

Supplement: f1 [file 352807.f1.pdf]
